# Supplementary material for: Pathogen and Host Response Dynamics in a Mouse Model of Borrelia hermsii Relapsing Fever
Source: PubMed Central journal article supplement (PMC5606581; doi:10.3390/vetsci3030019), 2016-08-30
Supplement: vetsci-03-00019-s001.pdf [file vetsci-03-00019-s001.pdf]

# Supplementary Materials: Pathogen and Host Response Dynamics in a Mouse Model of *Borrelia hermsii* Relapsing Fever

Christopher D. Crowder, Arash Ghalyanchi Langeroudi, Azadeh Shojaee Estabragh, Eric R. G. Lewis, Renee A. Marcsisin and Alan G. Barbour

**Table S1.** Serum protein analytes of rodent panel.

| Analyte                                          | Abbreviation             | Alternative | Protein Class         |
|--------------------------------------------------|--------------------------|-------------|-----------------------|
| Apolipoprotein A1                                | Apo A1                   |             | Lipoprotein component |
| Beta-2 Microglobulin                             | $\beta$ -2 microglobulin |             | MHC II component      |
| Calbindin                                        |                          |             | Calcium-binding       |
| CD40                                             |                          |             | Cell receptor         |
| CD40 Ligand                                      | CD40L                    | CD154       | Receptor ligand       |
| Clusterin                                        |                          |             | Chaperone             |
| C-reactive Protein                               | CRP                      |             | Acute-phase protein   |
| Cystatin-C                                       |                          |             | Protease inhibitor    |
| Epidermal Growth Factor                          | EGF                      |             | Growth factor         |
| Endothelin-1                                     |                          |             | Vasoconstrictor       |
| Eotaxin                                          |                          | CCL11       | Chemokine             |
| Factor VII                                       |                          |             | Clotting factor       |
| Fibroblast Growth Factor-9                       | FGF-9                    |             | Growth factor         |
| Fibroblast Growth Factor-2                       | FGF-2                    |             | Growth factor         |
| Fibrinogen                                       |                          |             | Acute-phase protein   |
| Glutathione S-Transferase                        | GST                      |             | Enzyme                |
| Granulocyte Chemotactic Protein-2                | GCP-2                    | CXCL6       | Chemokine             |
| Granulocyte Macrophage-Colony Stimulating Factor | GM-CSF                   | CSF2        | Cytokine              |
| Growth Hormone                                   |                          |             | Hormone               |
| Growth-Regulated Alpha Protein                   | KC/GRO $\alpha$          | CXCL1       | Chemokine             |
| Haptoglobin                                      |                          |             | Acute-phase protein   |
| Interferon-gamma                                 | IFN- $\gamma$            |             | Cytokine              |
| Immunoglobulin A                                 | IgA                      |             | Immunoglobulin        |
| Interleukin-10                                   | IL-10                    |             | Cytokine              |
| Interleukin-11                                   | IL-11                    |             | Cytokine              |
| Interleukin-12p70                                | IL-12p70                 |             | Cytokine              |
| Interleukin-17                                   | IL-17                    |             | Cytokine              |
| Interleukin-18                                   | IL-18                    |             | Cytokine              |
| Interleukin-1alpha                               | IL-1 $\alpha$            |             | Cytokine              |
| Interleukin-1beta                                | IL-1 $\beta$             |             | Cytokine              |
| Interleukin-2                                    | IL-2                     |             | Cytokine              |
| Interleukin-3                                    | IL-3                     |             | Cytokine              |
| Interleukin-4                                    | IL-4                     |             | Cytokine              |
| Interleukin-5                                    | IL-5                     |             | Cytokine              |
| Interleukin-6                                    | IL-6                     |             | Cytokine              |
| Interleukin-7                                    | IL-7                     |             | Cytokine              |
| Insulin                                          |                          |             | Hormone               |

Table S1. Cont.

| Analyte                                                         | Abbreviation   | Alternative    | Protein Class       |
|-----------------------------------------------------------------|----------------|----------------|---------------------|
| Inducible Protein-10                                            | IP-10          | CXCL10         | Chemokine           |
| Leptin                                                          |                |                | Hormone             |
| Leukemia Inhibitory Factor                                      | LIF            |                | Cytokine            |
| Lymphotactin                                                    |                | XCL1           | Chemokine           |
| Monocyte Chemoattractant Protein-1                              | MCP-1          | CCL2           | Chemokine           |
| Monocyte Chemoattractant Protein-3                              | MCP-3          | CCL7           | Chemokine           |
| Monocyte Chemoattractant Protein-5                              | MCP-5          | CCL12          | Chemokine           |
| Macrophage-Colony Stimulating Factor                            | M-CSF          | CSF1           | Cytokine            |
| Macrophage-Derived Chemokine                                    | MDC            | CCL22          | Chemokine           |
| Macrophage Inflammatory Protein-1alpha                          | MIP-1 $\alpha$ | CCL3           | Chemokine           |
| Macrophage Inflammatory Protein-1beta                           | MIP-1 $\beta$  | CCL4           | Chemokine           |
| Macrophage Inflammatory Protein-1gamma                          | MIP-1 $\gamma$ | CCL9           | Chemokine           |
| Macrophage Inflammatory Protein-2                               | MIP-2          | CXCL1          | Chemokine           |
| Macrophage Inflammatory Protein-3beta                           | MIP-3          | CCL19          | Chemokine           |
| Matrix Metalloproteinase-9                                      | MMP-9          |                | Enzyme              |
| Myeloperoxidase                                                 | MPO            |                | Enzyme              |
| Myoglobin                                                       |                |                | Muscle protein      |
| Lipocalin-2                                                     | LCN2           | NGAL           | Transport protein   |
| Oncostatin M                                                    | OSM            |                | Cytokine            |
| Osteopontin                                                     | OPN            |                | Immune modulator    |
| “Regulation upon Activation, Normal T-cell Expressed, Secreted” | RANTES         | CCL5           | Chemokine           |
| Serum Amyloid P                                                 | SAP            |                | Acute-phase protein |
| Stem Cell Factor                                                | SCF            | KITLG          | Cytokine            |
| Serum Glutamic-Oxaloacetic Transaminase                         | SGOT           |                | Enzyme              |
| Tissue Inhibitor of Metalloproteinase Type-1                    | TIMP-1         |                | Protease inhibitor  |
| Tissue Factor                                                   |                | Thromboplastin | Clotting factor     |
| Tumor Necrosis Factor-alpha                                     | TNF-a          |                | Cytokine            |
| Thrombopoietin                                                  | TPO            | THPO           | Hormone             |
| Vascular Cell Adhesion Molecule-1                               | VCAM-1         |                | Adhesion protein    |
| Vascular Endothelial Cell Growth Factor                         | VEGF           |                | Growth factor       |
| von Willebrand Factor                                           | vWF            |                | Acute-phase protein |
